# Supplementary material for: Plasma-induced construction of defect-enriched perovskite oxides for catalytic methane combustion
Source: Royal Society of Chemistry journal article supplement (doi:10.1039/d1en00339a), 2021-01-01
Supplement: d1en00339a1.pdf [file d1en00339a1.pdf]

## Supporting Information

### Plasma-induced construction of defect-enriched perovskite oxides for catalytic methane combustion

*Qingqing Tian<sup>a</sup>, Zhicheng Wang<sup>a</sup>, Minghao Yuan<sup>a</sup>, Shuai Zhao<sup>a</sup>, Huawei Chen<sup>a</sup>, Lei Li<sup>b,\*</sup>,  
Mifen Cui<sup>a</sup>, Xu Qiao<sup>a</sup>, Zhaoyang Fei<sup>a,\*</sup>*

*a State Key Laboratory of Materials-Oriented Chemical Engineering, College of Chemical  
Engineering, Nanjing Tech University, Nanjing, 211816, PR China*

*b School of Chemistry and Chemical Engineering, Yancheng Institute of Technology, Yancheng,  
224051, PR China*

**\*Corresponding Authors**

*E-mail: [lee\\_ycit@yahoo.com](mailto:lee_ycit@yahoo.com)*

*E-mail: [zhaoyangfei@njtech.edu.cn](mailto:zhaoyangfei@njtech.edu.cn)*

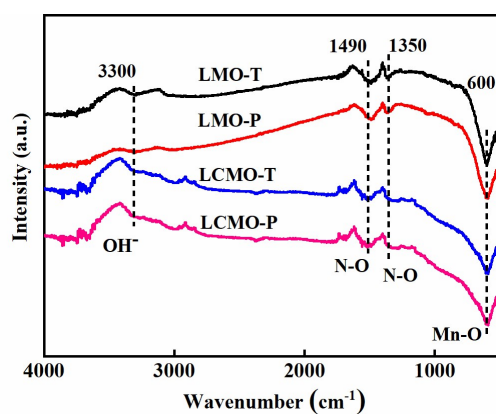

**Fig.S1** FTIR spectra of all catalysts.

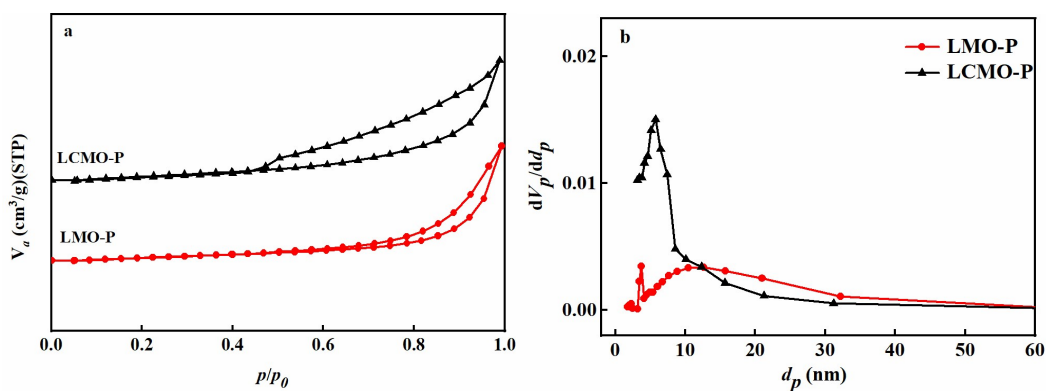

**Fig.S2** (a) N<sub>2</sub> adsorption-desorption isotherms and (b) pore-size distributions of LMO-P and LCMO-P catalysts.

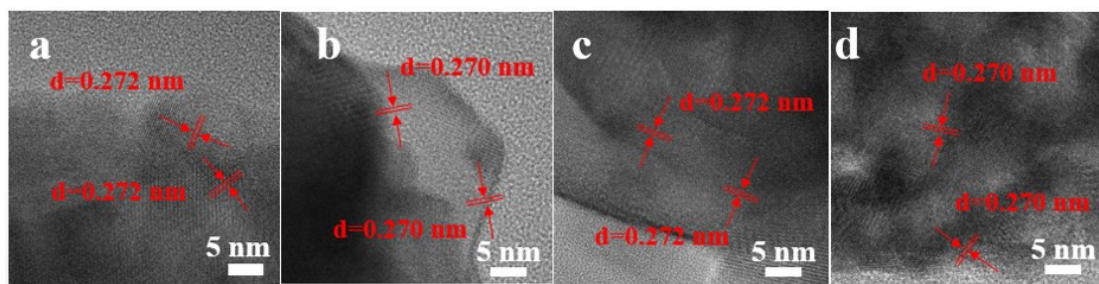

**Fig.S3** HRTEM images of (a) LMO-T, (b) LCMO-T, (c) LMO-P and (d) LCMO-P catalysts.

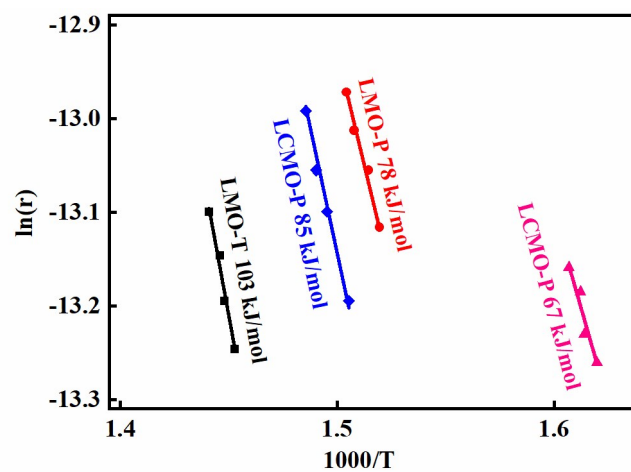

**Fig.S4** Arrhenius plots for CH<sub>4</sub> combustion over all catalysts.

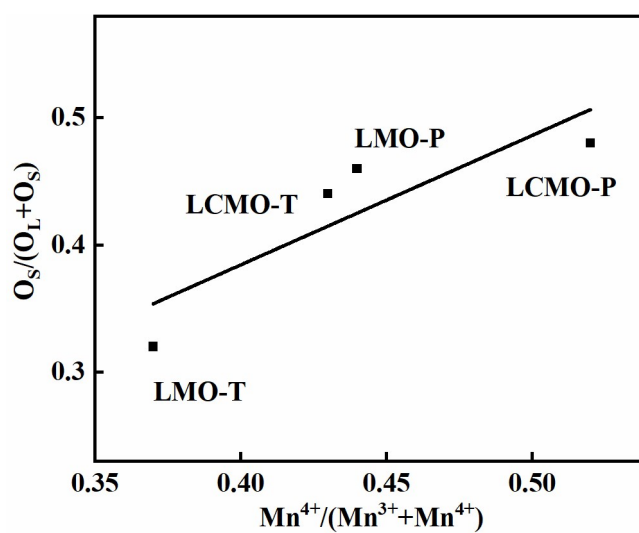

**Fig.S5** Relationship among the  $Mn^{4+}/(Mn^{3+}+Mn^{4+})$  and  $O_S/(O_S+O_L)$  of all catalysts.

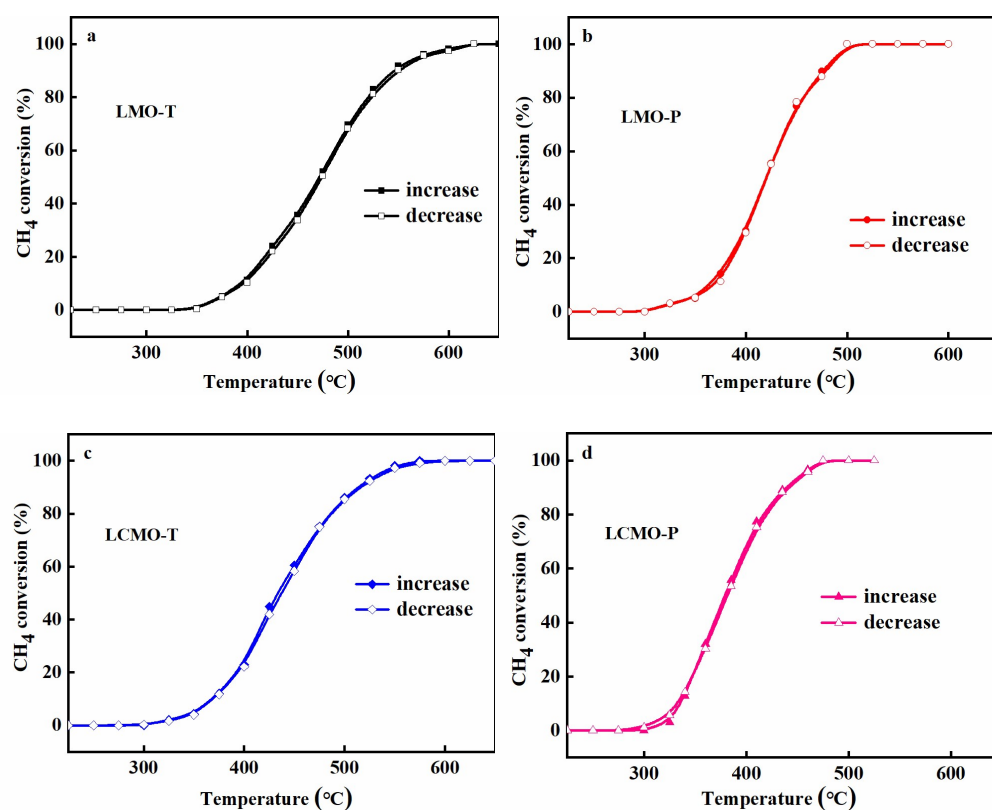

**Fig.S6** Cycle performance tests of all catalysts.

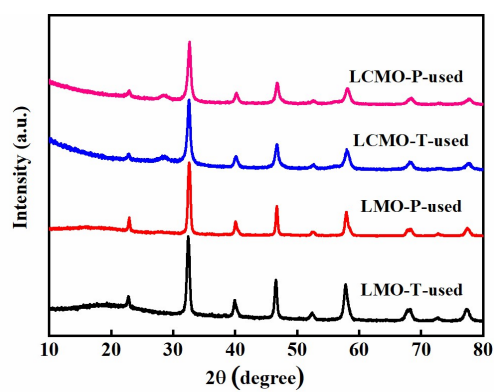

**Fig.S7** XRD patterns of all used catalysts.

**Tab.S1** Detailed data of pore volume ( $V_p$ ), average pore size ( $D_p$ ), ICP results and surface atomic concentration of all catalysts

| Catalysts | $V_p^a$<br>( $\text{cm}^3 \cdot \text{g}^{-1}$ ) | $D_p^a$ (nm) | Ce content <sup>b</sup><br>(wt.%) | Surface atomic concentration (%) |      |     |
|-----------|--------------------------------------------------|--------------|-----------------------------------|----------------------------------|------|-----|
|           |                                                  |              |                                   | Mn                               | La   | Ce  |
| LMO-T     | -                                                | -            | -                                 | 16.1                             | 22.0 | -   |
| LMO-P     | 0.12                                             | 27.9         | -                                 | 17.0                             | 23.2 | -   |
| LCMO-T    | -                                                | -            | 11.7                              | 17.6                             | 16.2 | 3.2 |
| LCMO-P    | 0.23                                             | 11.0         | 11.2                              | 19.5                             | 16.6 | 2.1 |

<sup>a</sup> The data were calculated by BJH method according to the desorption branch.

<sup>b</sup> The data were calculated by ICP analysis.

**Tab.S2** Comparison of  $\text{CH}_4$  catalytic oxidation over other catalysts reported in the literature.

| Catalysts                                      | Reaction conditions                              | $T_{50}$ | $T_{90}$ | Reaction rate<br>( $\mu\text{mol} \cdot \text{g}^{-1} \cdot \text{s}^{-1}$ ) <sup>a</sup> | Ref.      |
|------------------------------------------------|--------------------------------------------------|----------|----------|-------------------------------------------------------------------------------------------|-----------|
|                                                |                                                  | (°C)     | (°C)     |                                                                                           |           |
| LCMO-P                                         | 2.5 vol.% $\text{CH}_4$ , 30000 $\text{h}^{-1}$  | 380      | 440      | 1.47                                                                                      | This work |
| $\text{LaMn}_{0.8}\text{Mg}_{0.2}\text{O}_3$   | 1 vol.% $\text{CH}_4$ , 30000 $\text{h}^{-1}$    | 450      | 525      | 0.47                                                                                      | [1]       |
| $\text{LaMnO}_3$                               | 3 vol.% $\text{CH}_4$ , 30000 $\text{h}^{-1}$    | 480      | 570      | 1.31                                                                                      | [2]       |
| $\text{La}_{1-x}\text{FeO}_{3-\delta}$         | 0.5 vol.% $\text{CH}_4$ , 240000 $\text{h}^{-1}$ | 500      | 625      | 0.75                                                                                      | [3]       |
| $\text{NiO/LaNiO}_3$                           | 10 vol.% $\text{CH}_4$ , 36000 $\text{h}^{-1}$   | 480      | 575      | 0.79                                                                                      | [4]       |
| $\text{La}(\text{Mn, Fe})\text{O}_{3+\lambda}$ | 1 vol.% $\text{CH}_4$ , 15000 $\text{h}^{-1}$    | 439      | 493      | 0.32                                                                                      | [5]       |

<sup>a</sup> Reaction rate calculated from the active test at 350 °C.

## References:

- [1] Zhu L, Lu G, Wang Y, et al. Effects of preparation methods on the catalytic performance of  $\text{LaMn}_{0.8}\text{Mg}_{0.2}\text{O}_3$  perovskite for methane combustion. Chinese Journal of Catalysis, 2010, 31(8):1006-1012.
- [2] Guo G, Lian K, Wang L, et al. High specific surface area  $\text{LaMO}_3$  (M = Co, Mn) hollow spheres: synthesis, characterization and catalytic properties in methane combustion. RSC Advances, 2014, 4(102):58699-58707.
- [3] Faye J, Baylet A, Trentesaux M, et al. Influence of lanthanum stoichiometry in  $\text{La}_{1-x}\text{FeO}_{3-\delta}$  perovskites on their structure and catalytic performance in  $\text{CH}_4$  total oxidation. Applied Catalysis B-Environmental, 2012, 126:134-143.
- [4] Nie L, Wang J, Tan Q. In-situ preparation of macro/mesoporous  $\text{NiO/LaNiO}_3$  perovskite composite with enhanced methane combustion performance. Catalysis Communications, 2017, 97:1-4.
- [5] Miao F, Wang F, Mao D, et al. Effect of different reaction conditions on catalytic activity of  $\text{La}(\text{Mn, Fe})\text{O}_{3+\lambda}$  catalyst for methane combustion. Materials Research Express, 2019, 6(5) :15.
